# Supplementary material for: Single-step preparation of two-dimensionally organized gold particles via ionic liquid/metal sputter deposition
Source: Royal Society of Chemistry journal article supplement (doi:10.1039/c5cp01602a), 2015-01-01
Supplement: c5cp01602a1.pdf [file c5cp01602a1.pdf]

**Supporting Information for**

**Single-step Preparation of Two-dimensionally Organized  
Gold Particles via Ionic Liquid/Metal Sputter Deposition**

Daisuke Sugioka,<sup>a</sup> Tatsuya Kameyama,<sup>a</sup> Susumu Kuwabata<sup>b</sup> and Tsukasa Torimoto<sup>\*a</sup>

<sup>a</sup>*Graduate School of Engineering, Nagoya University, Furo-cho, Chikusa-ku, Nagoya 464-8603, Japan.*

<sup>b</sup>*Graduate School of Engineering, Osaka University, 2-1 Yamada-oka, Suita, Osaka 565-0871, Japan.*

E-mails: torimoto@apchem.nagoya-u.ac.jp

**Table S1** Molecular structures of RTILs used.

| Abbreviation          | Molecular Structure                                                                 | Name                                                                                 |
|-----------------------|-------------------------------------------------------------------------------------|--------------------------------------------------------------------------------------|
| HyEMI-BF <sub>4</sub> | 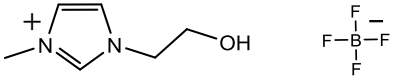   | 1-(2-hydroxyethyl)-3-methylimidazolium tetrafluoroborate                             |
| EMI-BF <sub>4</sub>   | 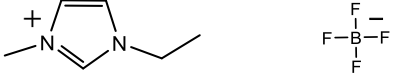   | 1-ethyl-3-methylimidazolium tetrafluoroborate                                        |
| BMI-BF <sub>4</sub>   | 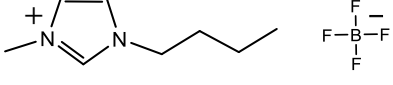   | 1-butyl-3-methylimidazolium tetrafluoroborate                                        |
| OMI-BF <sub>4</sub>   | 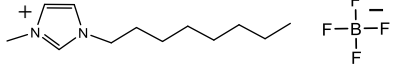   | 1-octyl-3-methylimidazolium tetrafluoroborate                                        |
| HyEMI-TFSA            | 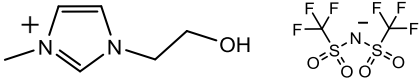   | 1-(2-hydroxyethyl)-3-methylimidazolium bis(trifluoromethanesulfonyl)amide            |
| EMI-TFSA              | 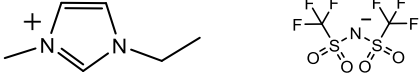 | 1-ethyl-3-methylimidazolium bis(trifluoromethanesulfonyl)amide                       |
| TMPA-TFSA             | 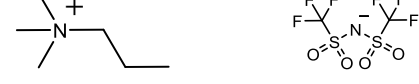 | <i>N,N,N</i> -trimethyl- <i>N</i> -propylammonium bis(trifluoromethanesulfonyl)amide |
| Ch-TFSA               | 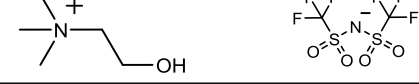 | 2-hydroxyethyl- <i>N,N,N</i> -trimethylammonium bis(trifluoromethanesulfonyl)amide   |
| SBMI-TFSA             | 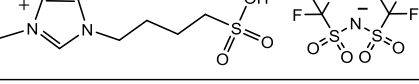 | 1-(4-sulfobutyl)-3-methylimidazolium bis(trifluoromethanesulfonyl)amide              |
| EMI-EtSO <sub>4</sub> | 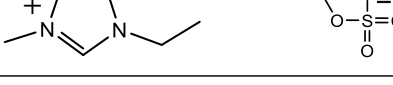 | 1-ethyl-3-methylimidazolium ethylsulfate                                             |
| EMI-Ac                | 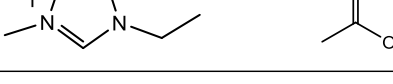 | 1-ethyl-3-methylimidazolium acetate                                                  |
| BMI-SCN               | 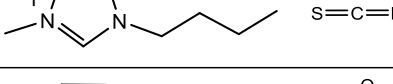 | 1-butyl-3-methylimidazolium thiocyanate                                              |
| BMI-lactate           | 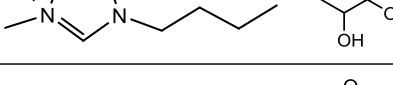 | 1-butyl-3-methylimidazolium (L)-lactate                                              |
| HyEA-formate          | 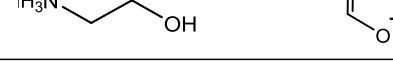 | (2-hydroxyethyl)ammonium formate                                                     |

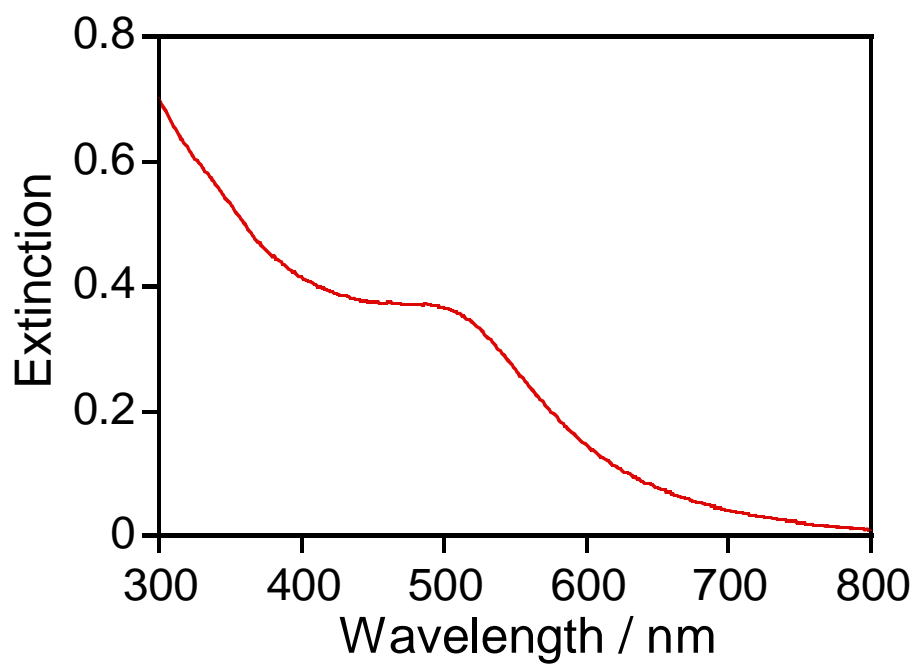

**Fig. S1** Extinction spectrum of Au nanoparticles uniformly dispersed in EMI-BF<sub>4</sub>. The particles were prepared by sputter deposition of Au on EMI-BF<sub>4</sub> for 300 s with a discharge current of 10 mA under an Ar pressure of 20 Pa.

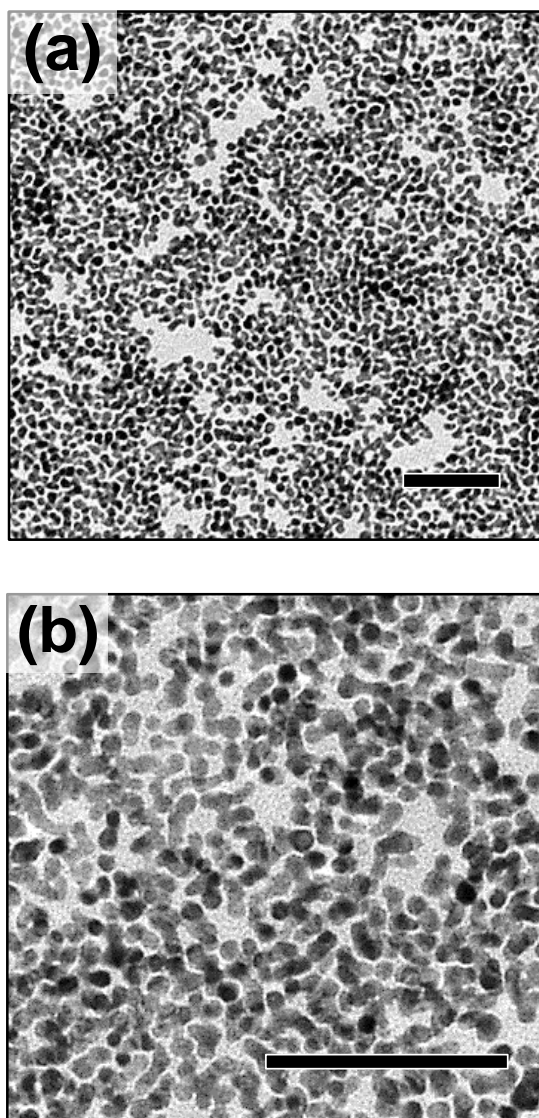

**Fig. S2** TEM images of Au monoparticle films prepared by sputter deposition of Au on HyEMI-BF<sub>4</sub> for 30 s with a discharge current of 40 mA under an Ar pressure of 20 Pa. Panel b is a magnified image of panel a. The bars in pictures represent a length of 20 nm.

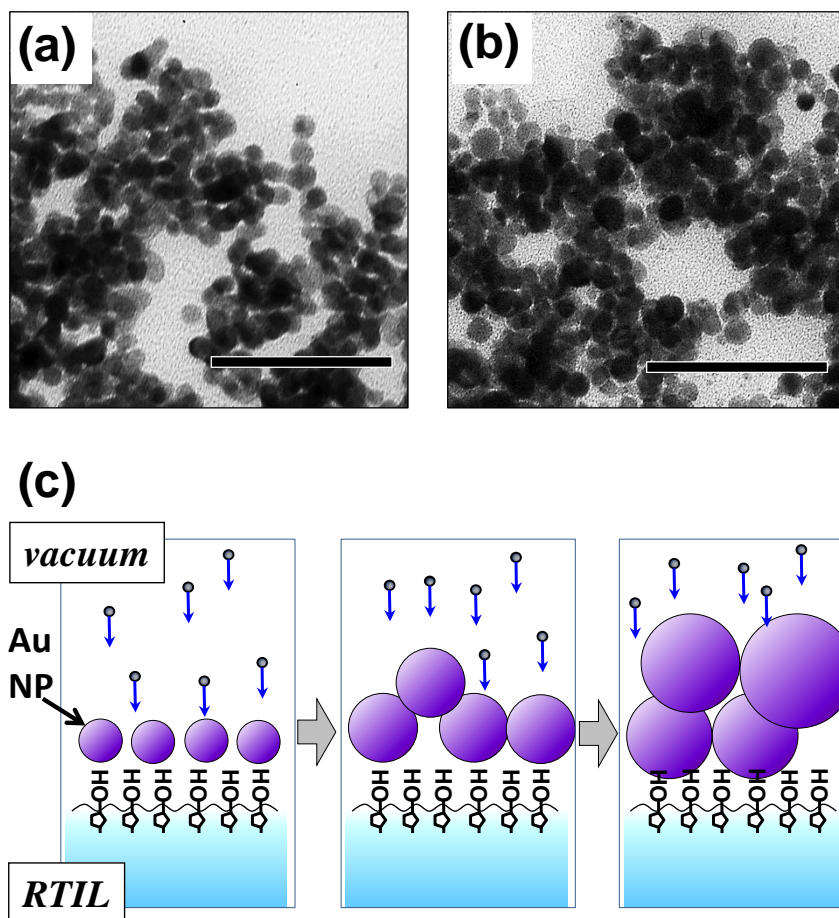

**Fig. S3** (a,b) TEM images of Au particles contained in multilayer particle films prepared by Au sputter deposition HyEMI-BF<sub>4</sub> for 600 (a) and 1200 s (b). The bars in pictures represent a length of 20 nm. Samples for TEM measurements were prepared by pulverizing multilayer particle films with sonication. (c) Schematic illustration of the multilayer film formation of Au particles along with collapse of monolayer by the crystal growth of individual particles on RTIL surface.

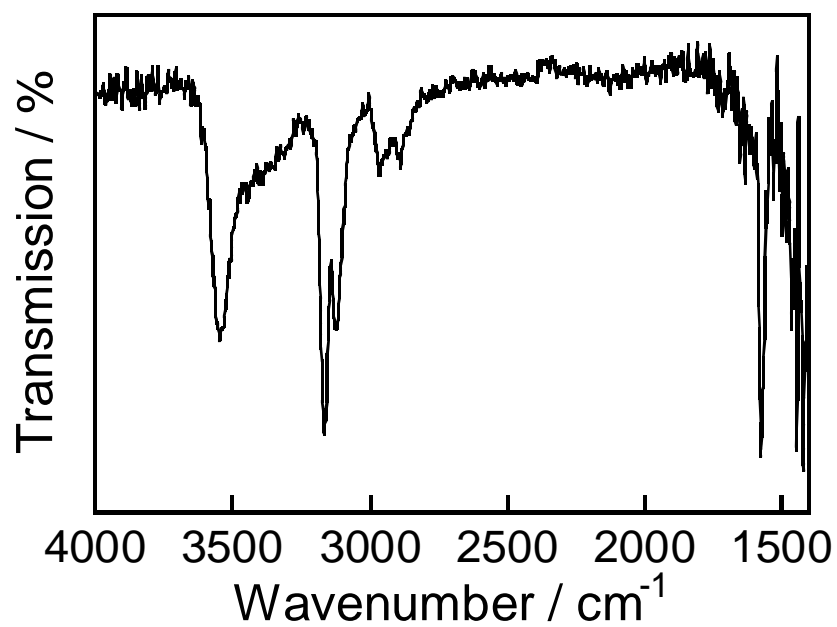

**Fig. S4** FT-IR spectrum of an Au monoparticle film immobilized on an Si substrate.  
The film was prepared by Au sputter deposition onto HyEMI-BF<sub>4</sub> for 300 s.

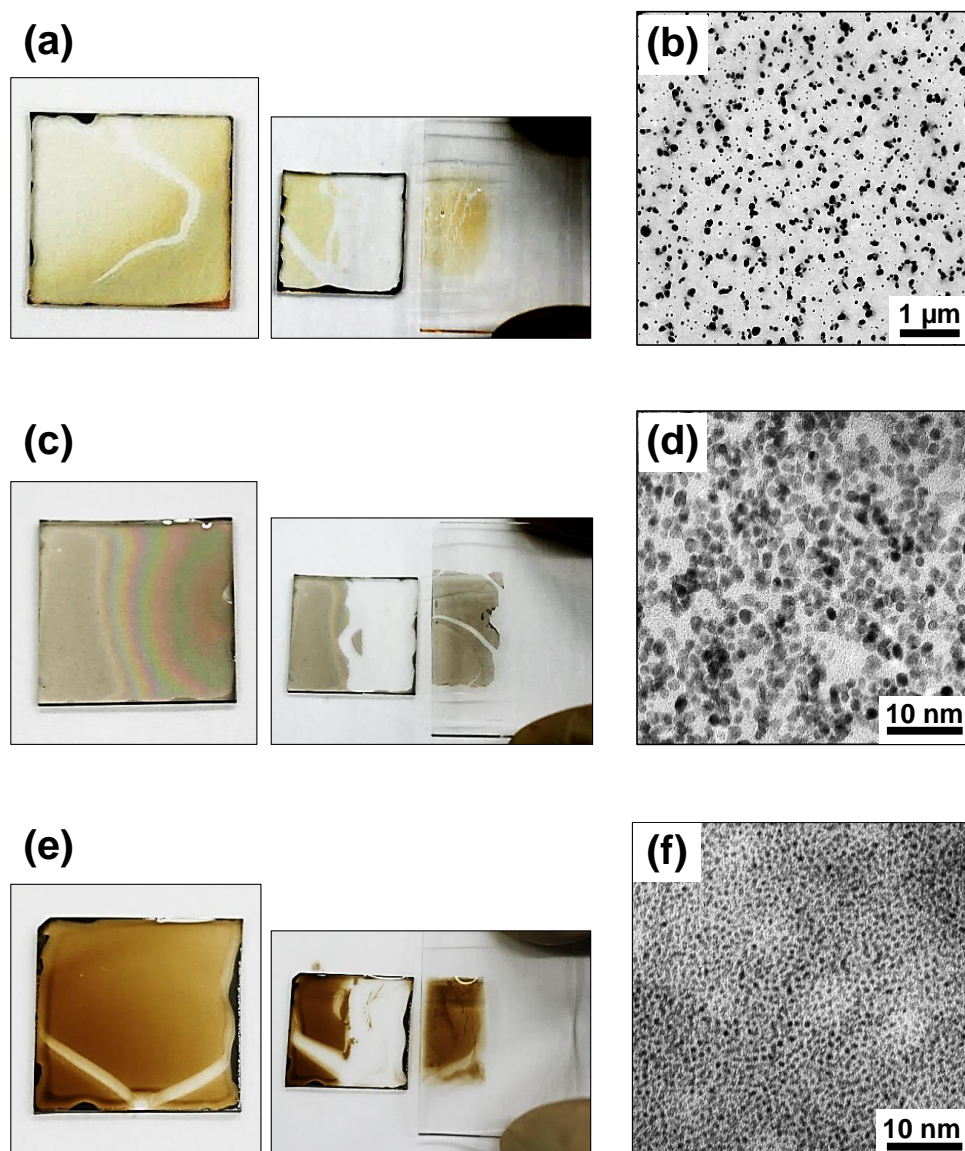

**Fig. S5** Top view photographs of metal monolayer films of Ag (a,b), Pd (c,d), and Pt (e,f) deposited on the HyEMI-BF<sub>4</sub> surface (a,c,e) and corresponding TEM images of metal films transferred on TEM grids (b,d,f). The films of Ag and Pd were prepared by sputter deposition of corresponding metals with discharge current of 10 mA under an Ar pressure of 20 Pa, while Pt films were prepared by Pt sputtering with current of 40 mA at the same Ar pressure. The sputtering time for each case was 300 s.
